# Supplementary material for: Protocol for a feasibility randomised controlled trial of targeted oxygen therapy in mechanically ventilated critically ill patients
Source: PubMed Central journal article supplement (PMC6340470; doi:10.1136/bmjopen-2018-021674), 2019-01-17
Supplement: bmjopen-2018-021674supp001.pdf [file bmjopen-2018-021674supp001.pdf]

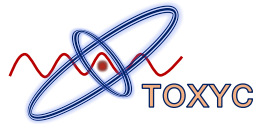

Guidelines for patients in the **INTERVENTION** group of the **TOXYC** study: Targeted **OXY**gen therapy in **Critical** illness

## TARGET SpO<sub>2</sub> RANGE: 88 to 92%

Advice on how to maintain your patient's in the target SpO<sub>2</sub> range for this study:

**SpO<sub>2</sub>**  
> 92%

Reduce FiO<sub>2</sub> in 5-10% intervals every 10 minutes until the SpO<sub>2</sub> is equal to or less than 92%

**SpO<sub>2</sub>**  
88-92%

Maintain SpO<sub>2</sub> in target range, reducing or increasing FiO<sub>2</sub> in 5% intervals every 10 minutes if required

**SpO<sub>2</sub>**  
< 88%

Increase FiO<sub>2</sub> in 5-10% intervals every 10 minutes until the SpO<sub>2</sub> is equal to or greater than 88%

Other guidance for patients in the **INTERVENTION** group:

- Aim to use the lowest FiO<sub>2</sub> possible to achieve the target SpO<sub>2</sub>.
- Try to avoid excessive use of oxygen prior to interventions such as suctioning. Increasing the FiO<sub>2</sub> by approximately 0.25-0.30 (25-30%) briefly should be sufficient in most stable patients.
- Once an FiO<sub>2</sub> of 0.21 (21%) has been reached continue to monitor SpO<sub>2</sub> but no further downwards titration of FiO<sub>2</sub> will be possible.
- Set the SpO<sub>2</sub> alarm limits on the monitor to: LOW = **87%**; HIGH = **93%**.
- Do not adjust the FiO<sub>2</sub> according to the arterial blood gas PaO<sub>2</sub>.
- Any mode of ventilation can be used and settings such as the tidal volume, respiratory rate and PEEP can be selected by the patient's clinical team.
- Record all the patient's hourly information in the usual way.
- Please try to minimise unnecessary 100% oxygen boluses and record them all on the ICU chart.

If you have any questions or concerns about the study please contact:  
daniel.martin@ucl.ac.uk or margaret.mcneil@nhs.net

Thank you for helping us to deliver this study.

*Funded by the National Institute for Health Research and Royal Free Charity*
