# Supplementary material for: Protocol for a feasibility randomised controlled trial of targeted oxygen therapy in mechanically ventilated critically ill patients
Source: PubMed Central journal article supplement (PMC6340470; doi:10.1136/bmjopen-2018-021674), 2019-01-17
Supplement: bmjopen-2018-021674supp002.pdf [file bmjopen-2018-021674supp002.pdf]

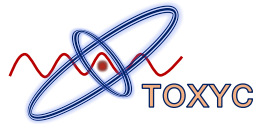

Guidelines for patients in the **CONTROL** group of the **TOXYC** study:  
**T**argeted **OXY**gen therapy in **C**ritical illness

**TARGET SpO<sub>2</sub> RANGE: ≥ 96%**

Advice on how to maintain your patient's in the target SpO<sub>2</sub> range for this study:

**SpO<sub>2</sub>**  
**96-100%**

Maintain SpO<sub>2</sub> at or above 96% by increasing or reducing FiO<sub>2</sub> in 5% intervals every 10 minutes if required

**SpO<sub>2</sub>**  
**< 96%**

Increase FiO<sub>2</sub> in 5-10% intervals every 10 minutes until the SpO<sub>2</sub> is equal to or greater than 96%

Other guidance for patients in the **CONTROL** group:

- Once an FiO<sub>2</sub> of 0.21 (21%) has been reached continue to monitor SpO<sub>2</sub> but no further downwards titration of FiO<sub>2</sub> will be possible.
- Set the LOW SpO<sub>2</sub> alarm limit on the monitor to **95%**.
- Do not adjust the FiO<sub>2</sub> according to the arterial blood gas PaO<sub>2</sub>, however, if the SpO<sub>2</sub> is consistently at 100%, care must be taken to avoid unnecessary hyperoxaemia.
- Any mode of ventilation can be used and settings such as the tidal volume, respiratory rate and PEEP can be selected by the patient's clinical team.
- Record all the patient's hourly information in the usual way.
- Please record all 100% oxygen boluses on the ICU chart.

If you have any questions or concerns about the study please contact:  
daniel.martin@ucl.ac.uk or margaret.mcneil@nhs.net

Thank you for helping us to deliver this study.

*Funded by the National Institute for Health Research and Royal Free Charity*
